# Supplementary material for: Pharmacokinetics and pharmacodynamics of repeat dosing of gabapentin in adult horses
Source: PubMed Central journal article supplement — J Vet Intern Med. 2022 Feb 12;36(2):792–7. doi: 10.1111/jvim.16386 (PMC8965223; doi:10.1111/jvim.16386), 2022-02-12
Supplement: JVIM-36-792-s001.pdf [file JVIM-36-792-s001.pdf]

**Supplemental Table 2:** Plasma pharmacokinetic parameters (median [range]) derived from a 1-or 2-compartmental model with first-order absorption for gabapentin in horses after oral administration at 40 and 120 mg/Kg of body weight q 12 h for 14 days.

| PK parameter         | Unit    | 40 mg/Kg<br>first dose (n=6) | 40 mg/Kg<br>last dose (n=6)  | 120 mg/Kg<br>first dose (n=5) | 120 mg/Kg<br>last dose (n=6)  |
|----------------------|---------|------------------------------|------------------------------|-------------------------------|-------------------------------|
| K01                  | 1/h     | 1.11<br>(0.73-2.98)          | 12.0<br>(4.89-18.1)          | 1.33<br>(0.78-1.43)           | 44<br>(18-68)                 |
| K01_HL               | h       | 0.63<br>(0.23-0.95)          | 0.07<br>(0.04-0.14)          | 0.52<br>(0.49-0.88)           | 0.02<br>(0.01-0.04)           |
| K10                  | 1/h     | 0.08<br>(0.02-0.21)          | 0.06<br>(0.02-0.13)          | 0.08<br>(0.05-0.13)           | 0.05<br>(0.03-0.08)           |
| K10_HL               | h       | 11<br>(3.4-44)               | 11<br>(5.54-28.8)            | 9.16<br>(5.51-14.6)           | 15<br>(8.3-21)                |
| k12                  | 1/h     | 0.63<br>(0.38-0.9)           | 0.51<br>(0.03-4.11)          | 0.19<br>(0.08-0.83)           | 0.06<br>(0.01-0.08)           |
| k21                  | 1/h     | 0.12<br>(0.09-0.27)          | 0.79<br>(0.15-3.19)          | 0.16<br>(0.04-0.29)           | 0.24<br>(0.04-0.43)           |
| Tmax                 | h       | 1.3<br>(1.00-2.56)           | 0.34<br>(0.23-0.5)           | 1.89<br>(1.1-2.7)             | 0.15<br>(0.09-0.29)           |
| Cmax                 | ug/mL   | 6.5<br>(5.1-8.2)             | 7.8<br>(6.5-10)              | 9.4<br>(5.0-2.3)              | 22<br>(13-28)                 |
| AUC <sub>0-∞</sub>   | ug*h/mL | 200<br>(55-840)              | 140 <sup>a</sup><br>(99-400) | 130<br>(78-860)               | 500 <sup>b</sup><br>(250-620) |
| AUC <sub>0-12h</sub> | ug*h/mL | 39 <sup>a</sup><br>(25-72)   | 62 <sup>b</sup><br>(48-98)   | 63 <sup>b</sup><br>(45-162)   | 180 <sup>c</sup><br>(120-220) |

AUC<sub>0-∞</sub>= area under the plasma concentration-time curve from 0 hours to infinity after dosing; AUC<sub>0-12h</sub> = area under the plasma concentration-time curve from 0 hours to infinity after dosing Cmax = maximum concentration; Tmax = time to maximum concentration, K01 = Absorption rate constant. K01\_HL: half-life of absorption. K10 = terminal rate constant. K10\_HL = Half-life of the terminal portion of the curve after oral administration. k12 and k21 = Microdistribution rate constants from the central compartment (1) to peripheral compartment (2) and from the peripheral (2) to central compartment (1), respectively. For the 40 mg/Kg dosage regimen, data from 3 and 5 horses were modeled using a 2-compartmental approach after the first and last dose, respectively. For the 120 mg/Kg dosage regimen, data from 3 were modeled using a 2-compartmental approach. The median AUC<sub>0-∞</sub> for each dose level was compared statistically using the Mann-Whitney U test. The % extrapolated ranged between 3 and 22% and from 2.4 to 11% for the 40 and 120 mg/Kg, respectively. The different superscripts indicate p<0.05. AUC<sub>0-12h</sub> was only compared within each dose level. AUC<sub>0-∞</sub> was only compared between each dose level after the last treatment.
