# Supplementary material for: Pharmacokinetics and pharmacodynamics of repeat dosing of gabapentin in adult horses
Source: PubMed Central journal article supplement — J Vet Intern Med. 2022 Feb 12;36(2):792–7. doi: 10.1111/jvim.16386 (PMC8965223; doi:10.1111/jvim.16386), 2022-02-12
Supplement: JVIM-36-792-s002.pdf [file JVIM-36-792-s002.pdf]

**Supplemental Table 1:** Biochemistry parameters (mean and standard deviation) for trial 1 and trial 2. No significant difference was found between any of the parameters.

| Timeframe                     | Glucose<br>mg/dl | Creatinine<br>mg/dl | BUN<br>mg/dl  | BUN/<br>Creatinine | Ca <sup>2+</sup><br>mg/dl | Total<br>Protein<br>mg/dl | Albumin<br>mg/dl | Globulin<br>mg/dl | AST<br>U/L   | ALKP<br>U/L    | GGT<br>U/L    | Total<br>Bilirubin<br>U/L |
|-------------------------------|------------------|---------------------|---------------|--------------------|---------------------------|---------------------------|------------------|-------------------|--------------|----------------|---------------|---------------------------|
| <b>Trial 1 Pre-gabapentin</b> | 89.8<br>± 9.0    | 1.4<br>± 0.6        | 11.7<br>± 1.7 | 10.3<br>± 7.6      | 10.7<br>± 0.3             | 6.0<br>± 0.6              | 2.7<br>± 0.1     | 3.9<br>± 0.2      | 305<br>± 126 | 135<br>± 7.2   | 17<br>± 4.6   | 1.7± 0.6                  |
| <b>Trial 1 Day 7</b>          | 88.1<br>± 7.8    | 1.5<br>± 0.3        | 11.0<br>± 1.8 | 7.2<br>± 1.2       | 10.6<br>± 0.5             | 6.4<br>± 0.3              | 2.6<br>± 0.1     | 3.8<br>± 0.2      | 345<br>± 210 | 120<br>± 15.2  | 19<br>± 4.5   | 1.5± 0.4                  |
| <b>Trial 1 Day 14</b>         | 89.5<br>± 3.1    | 1.6<br>± 0.3        | 11.2<br>± 2.9 | 7.0<br>± 1.5       | 10.7<br>± 0.3             | 6.4<br>± 0.204            | 2.6<br>± 0.1     | 3.7<br>± 0.2      | 384<br>± 234 | 116<br>± 15.59 | 19<br>± 4.0   | 1.6± 0.6                  |
| <b>Trial 2 Pre-gabapentin</b> | 87.8<br>± 3.6    | 1.3<br>± 0.2        | 10.2<br>± 1.9 | 7.5<br>± 2.0       | 10.3<br>± 0.2             | 6.8<br>± 0.4              | 2.7<br>± 0.1     | 4.1<br>± 0.       | 298<br>± 84  | 124<br>± 14.5  | 20<br>± 4.099 | 1.2± 0.3                  |
| <b>Trial 2 Day 7</b>          | 88.3<br>± 3.8    | 1.5<br>± 0.4        | 12.7<br>± 3.3 | 9.0<br>± 3.3       | 10.3<br>± 0.4             | 6.8<br>± 0.2              | 2.6<br>± 0.2     | 4.1<br>± 0.1      | 275<br>± 276 | 124<br>± 16.35 | 17<br>± 2.5   | 1.6± 0.6                  |
| <b>Trial 2 Day 7</b>          | 85.8<br>± 10.5   | 1.5<br>± 0.4        | 10.0<br>± 3.3 | 6.7<br>± 3.7       | 10.7<br>± 0.4             | 6.8<br>± 0.2              | 2.7<br>± 0.1     | 4.1<br>± 0.3      | 267.<br>± 44 | 122<br>± 12.02 | 16<br>± 3.1   | 1.3± 0.5                  |
| <b>Reference Range*</b>       | 64-150           | 0.8-2.2             | 10-25         |                    | 10-12.9                   | 5.6-7.9                   | 1.9-3.2          | 2.4-4.7           | 100-600      | 10-326         | 0-87          | 0.0-3.5                   |

\*Reference range Idexx Laboratories Equine Clip 15
